# Supplementary material for: Estrogen induces St6gal1 expression and increases IgG sialylation in mice and patients with rheumatoid arthritis: a potential explanation for the increased risk of rheumatoid arthritis in postmenopausal women
Source: PubMed Central journal article supplement (PMC5932893; doi:10.1186/s13075-018-1586-z), 2018-05-02
Supplement: 13075_2018_1586_MOESM2_ESM.pdf [file 13075_2018_1586_MOESM2_ESM.pdf]

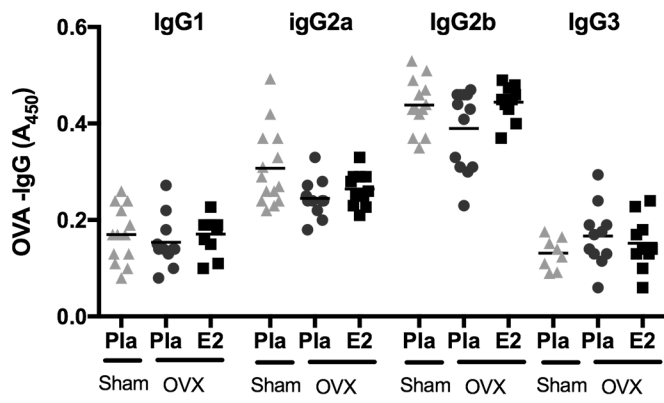

**Supplementary Figure 1.** Estrogen effects on ovalbumin-specific IgG subclasses. Ovariectomized mice received slow-release treatment pellets with placebo (Pla) or estrogen (E2; 0.83  $\mu\text{g}/\text{day}$ ). Ten days after ovariectomy, the animals were immunized with ovalbumin (OVA), and 14 days later, they were boosted. On day 38, IgG subclasses of ovalbumin (OVA)-specific IgG were measured. A scatterplot with means indicated by lines is shown ( $n=9-11$  mice per group). Statistical analysis was performed with analysis of variance followed by the Bonferroni multiple-comparisons test.

**Additional file 3:**
