# Supplementary material for: Estrogen induces St6gal1 expression and increases IgG sialylation in mice and patients with rheumatoid arthritis: a potential explanation for the increased risk of rheumatoid arthritis in postmenopausal women
Source: PubMed Central journal article supplement (PMC5932893; doi:10.1186/s13075-018-1586-z), 2018-05-02
Supplement: 13075_2018_1586_MOESM3_ESM.pdf [file 13075_2018_1586_MOESM3_ESM.pdf]

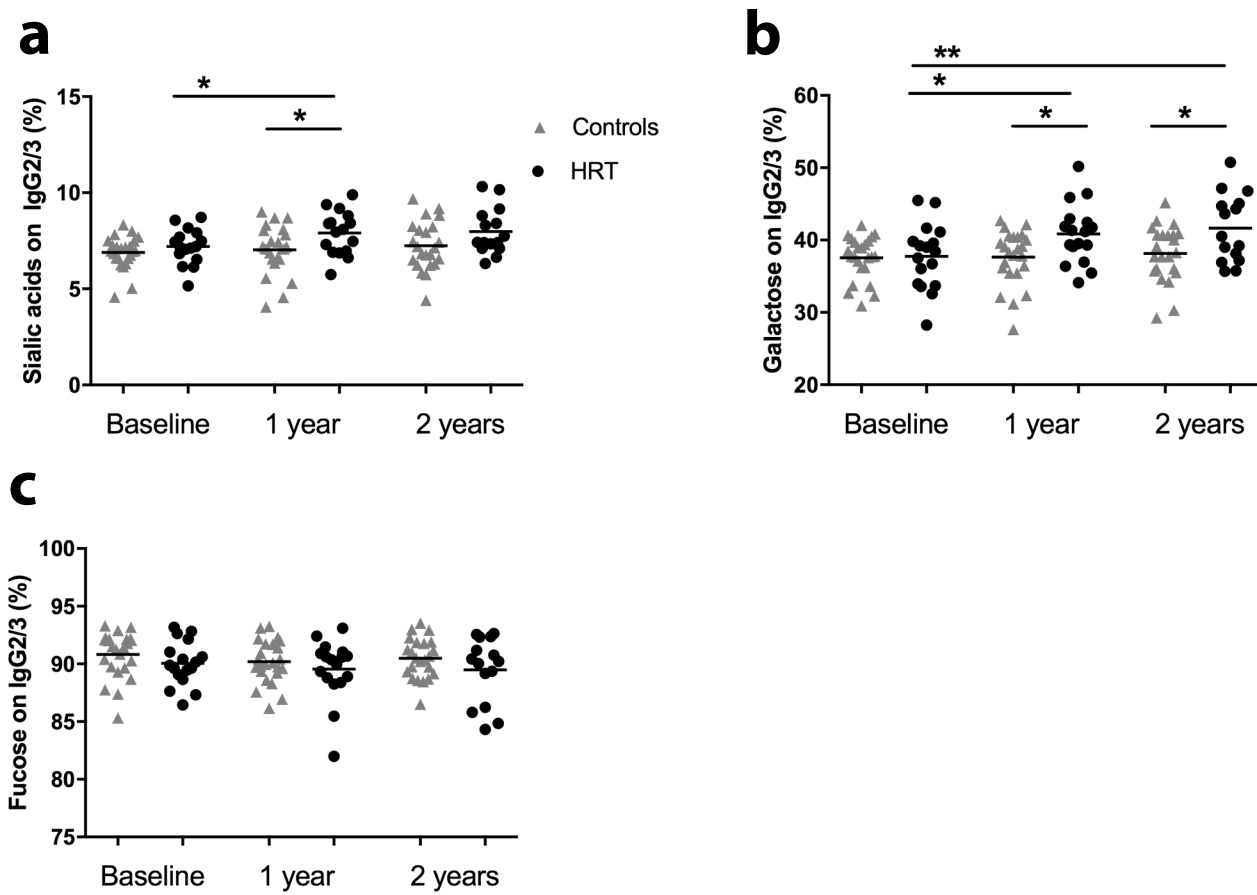

**Supplementary Figure 2.** Estrogen treatment increases IgG-Fc sialylation and IgG-Fc galactosylation in postmenopausal patients with rheumatoid arthritis (RA). Forty-nine postmenopausal women with active RA were included in a randomized controlled trial receiving either hormone replacement therapy (HRT) or no HRT. Serum samples were taken at baseline and after 1 year and 2 years of treatment. Mass spectrometry-based analysis of (a) sialic acids, (b) galactose, and (c) fucose of the Fc portion of IgG2/3 ( $n = 17-25$ ). Statistical analysis was performed with  $t$  tests at selected time points, as well as in an investigation over time in individuals who received HRT. \*  $p < 0.05$ , \*\*\*  $p < 0.001$ .
