# Supplementary material for: Estrogen induces St6gal1 expression and increases IgG sialylation in mice and patients with rheumatoid arthritis: a potential explanation for the increased risk of rheumatoid arthritis in postmenopausal women
Source: PubMed Central journal article supplement (PMC5932893; doi:10.1186/s13075-018-1586-z), 2018-05-02
Supplement: 13075_2018_1586_MOESM4_ESM.pdf [file 13075_2018_1586_MOESM4_ESM.pdf]

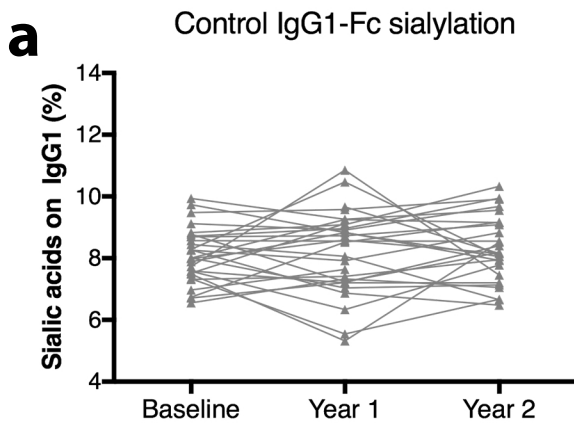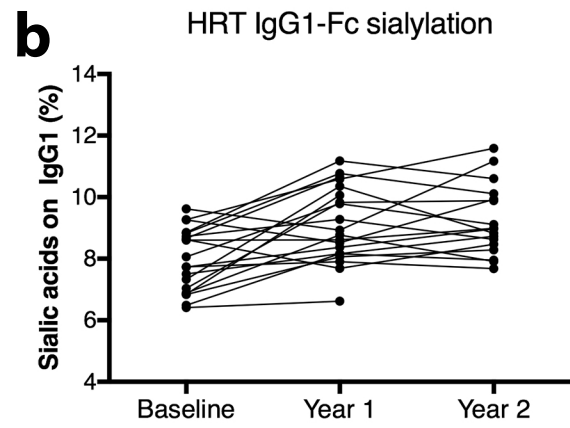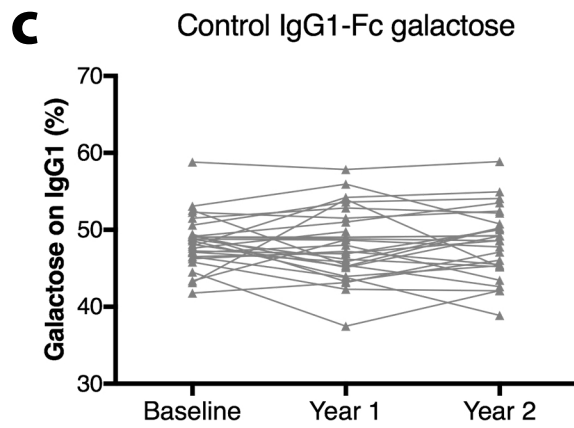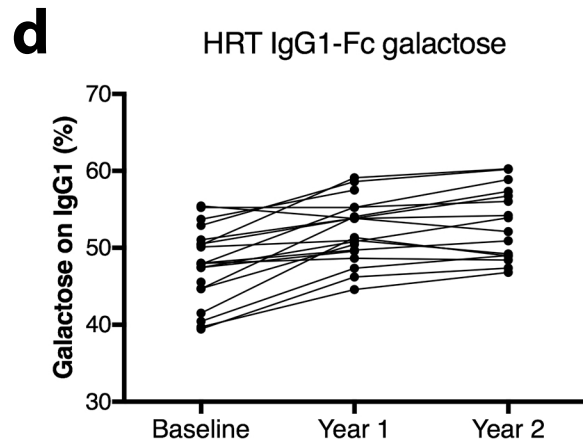

**Supplementary Figure 3.** Effects of estrogen on IgG-Fc sialylation and IgG-Fc galactosylation in individual patients. Analysis of (a, b) IgG-Fc sialylation and (c, d) IgG-Fc galactosylation in postmenopausal women with active rheumatoid arthritis (RA) randomized to receive hormone replacement therapy (HRT) (a, c) or no HRT (b, d) in a controlled trial. Each line represents one patient.
