# Supplementary material for: Estrogen induces St6gal1 expression and increases IgG sialylation in mice and patients with rheumatoid arthritis: a potential explanation for the increased risk of rheumatoid arthritis in postmenopausal women
Source: PubMed Central journal article supplement (PMC5932893; doi:10.1186/s13075-018-1586-z), 2018-05-02
Supplement: 13075_2018_1586_MOESM5_ESM.pdf [file 13075_2018_1586_MOESM5_ESM.pdf]

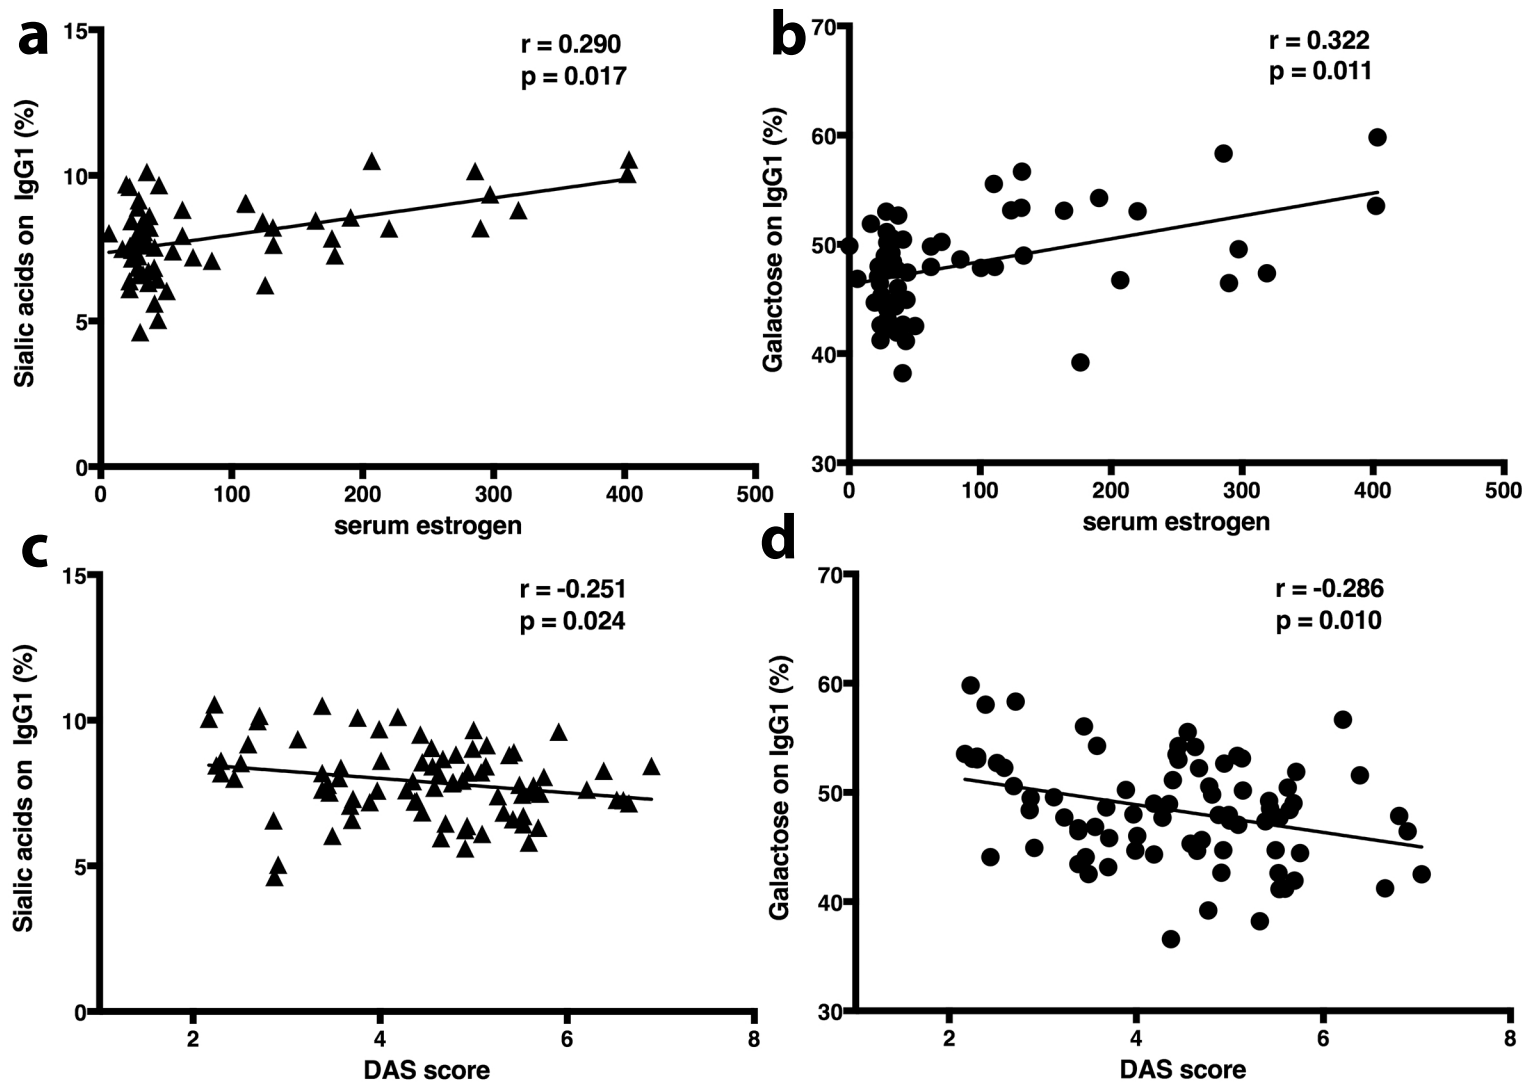

**Supplementary Figure 4.** Correlation between IgG glycosylation and estrogen levels and disease activity. Correlation between (a) IgG-Fc sialylation and (b) IgG-Fc galactosylation (y-axis) and estrogen level (x-axis). Correlation between (c) IgG-Fc sialylation and (d) IgG-Fc galactosylation (y-axis) and Disease Activity Score (DAS) (x-axis). Spearman's correlation coefficients ( $r$ ) and  $p$  values are shown.
